# Supplementary material for: UHPLC-ESI-ORBITRAP-MS analysis of the native Mapuche medicinal plant palo negro (Leptocarpha rivularis DC. – Asteraceae) and evaluation of its antioxidant and cholinesterase inhibitory properties
Source: PubMed Central journal article supplement (PMC6009940; doi:10.1080/14756366.2018.1466880), 2018-05-07

**UHPLC-ESI-ORBITRAP-MS-MS analysis of the Native Mapuche Medicinal Plant Palo Negro (*Leptocarpha rivularis* DC. – Asteraceae) and evaluation of its antioxidant and cholinesterase inhibitory properties**

**Andrea Jiménez-Gonzalez<sup>a</sup>, Cristina Quispe<sup>b</sup>, Jorge Bórquez<sup>c</sup>, Beatriz Sepúlveda<sup>d</sup>, Felipe Riveros<sup>c</sup>, Carlos Areche<sup>e</sup>, Edgar Nagles<sup>a</sup>, Olimpo García-Beltrán<sup>a\*</sup>, and Mario J. Simirgiotis<sup>f,g\*</sup>**

<sup>a</sup> *Facultad de Ciencias Naturales y Matematicas, Universidad de Ibague, Carrera 22 calle 67, Ibagué 730001, Colombia*

<sup>b</sup> *Instituto de Etnofarmacología, Universidad Arturo Prat, Facultad de Ciencias de la Salud, Casilla 121, Iquique, 1110939, Chile.*

<sup>c</sup> *Laboratorio de Productos Naturales, Departamento de Química, Facultad de Ciencias Básicas, Universidad de Antofagasta, 1240000, Chile*

<sup>d</sup> *Departamento de Ciencias Químicas, Universidad Andres Bello, Campus Viña del Mar, Quillota 980, Viña del Mar 2520000, Chile.*

<sup>e</sup> *Departamento de Química, Facultad de Ciencias, Universidad de Chile, Casilla 653, Santiago 7800024, Chile*

<sup>f</sup> *Instituto de Farmacia, Facultad de Ciencias, Universidad Austral de Chile, Campus Isla Teja 5090000, Valdivia.*

<sup>g</sup> *Center for Interdisciplinary Studies on the Nervous System, Universidad Austral de Chile, Campus Isla Teja 5090000, Valdivia.*

Corresponding authors: Olimpo García-Beltrán: Facultad de Ciencias Naturales y Matematicas, Universidad de Ibague, Carrera 22 calle 67, Ibagué 730001; Mario Simirgiotis: Instituto de Farmacia, Facultad de Ciencias, Universidad Austral de Chile, Campus Isla Teja 5090000, Valdivia; e mail: [mario.simirgiotis@uach.cl](mailto:mario.simirgiotis@uach.cl).

**Fig. S1 (a-l): Full Orbitrap HR-MS spectra and proposed structures of compounds 11, 13, 15, 16, 24, 26, 28 31- 35.**

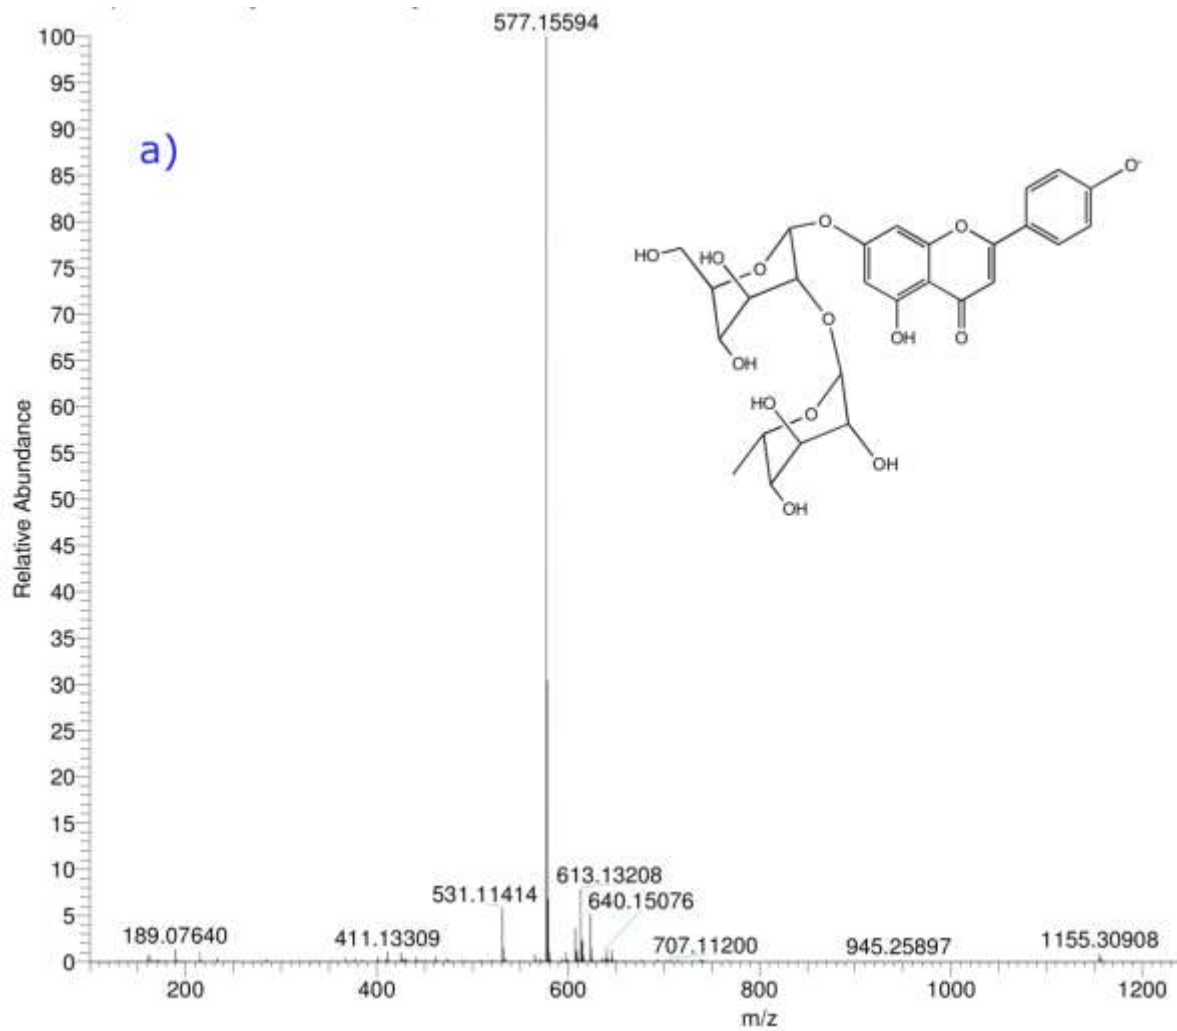

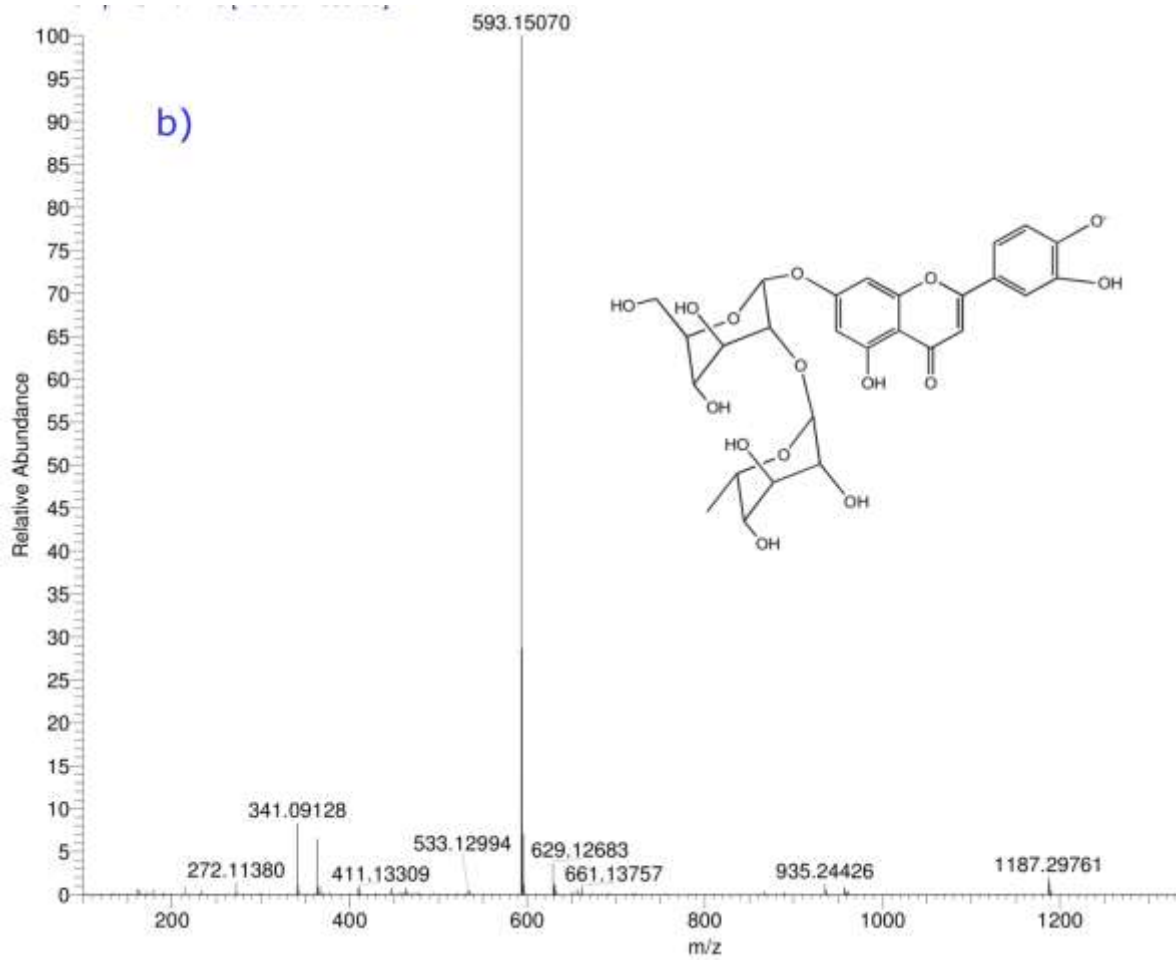

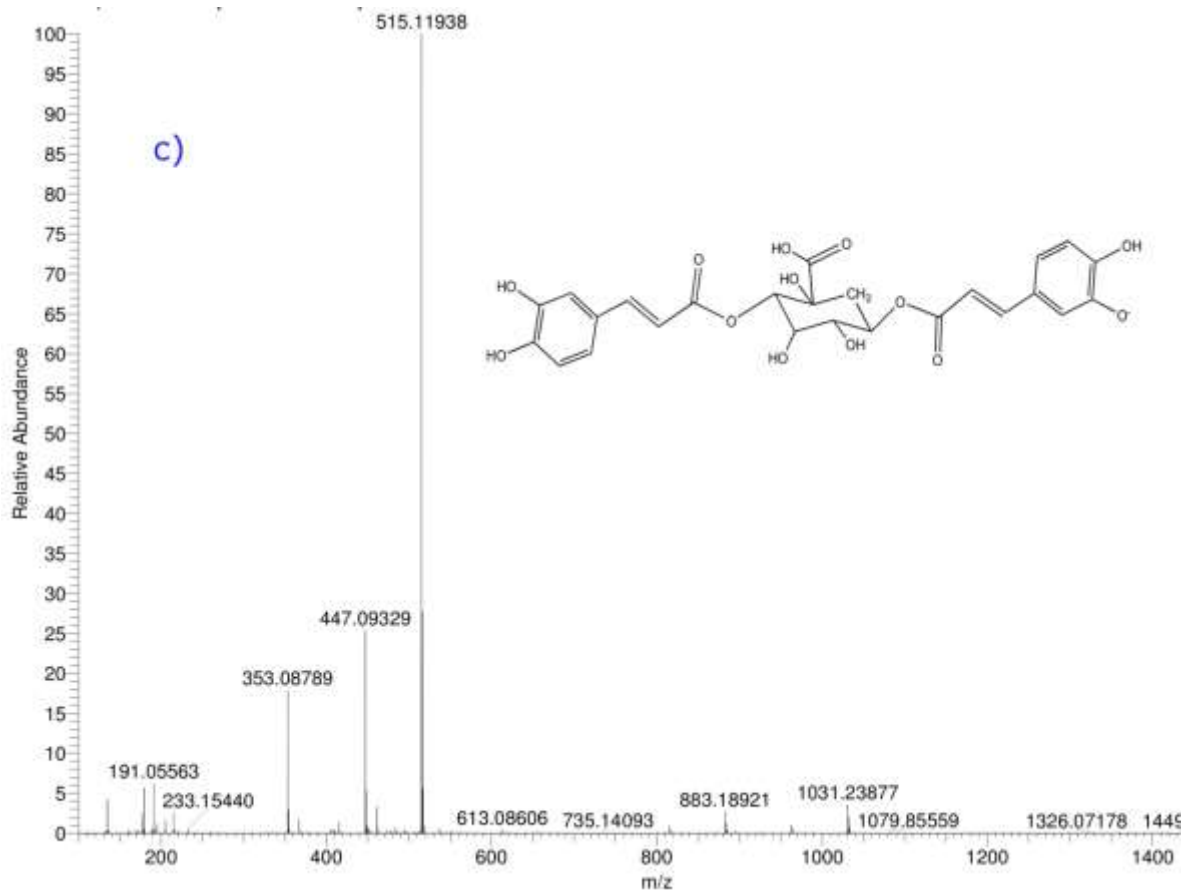

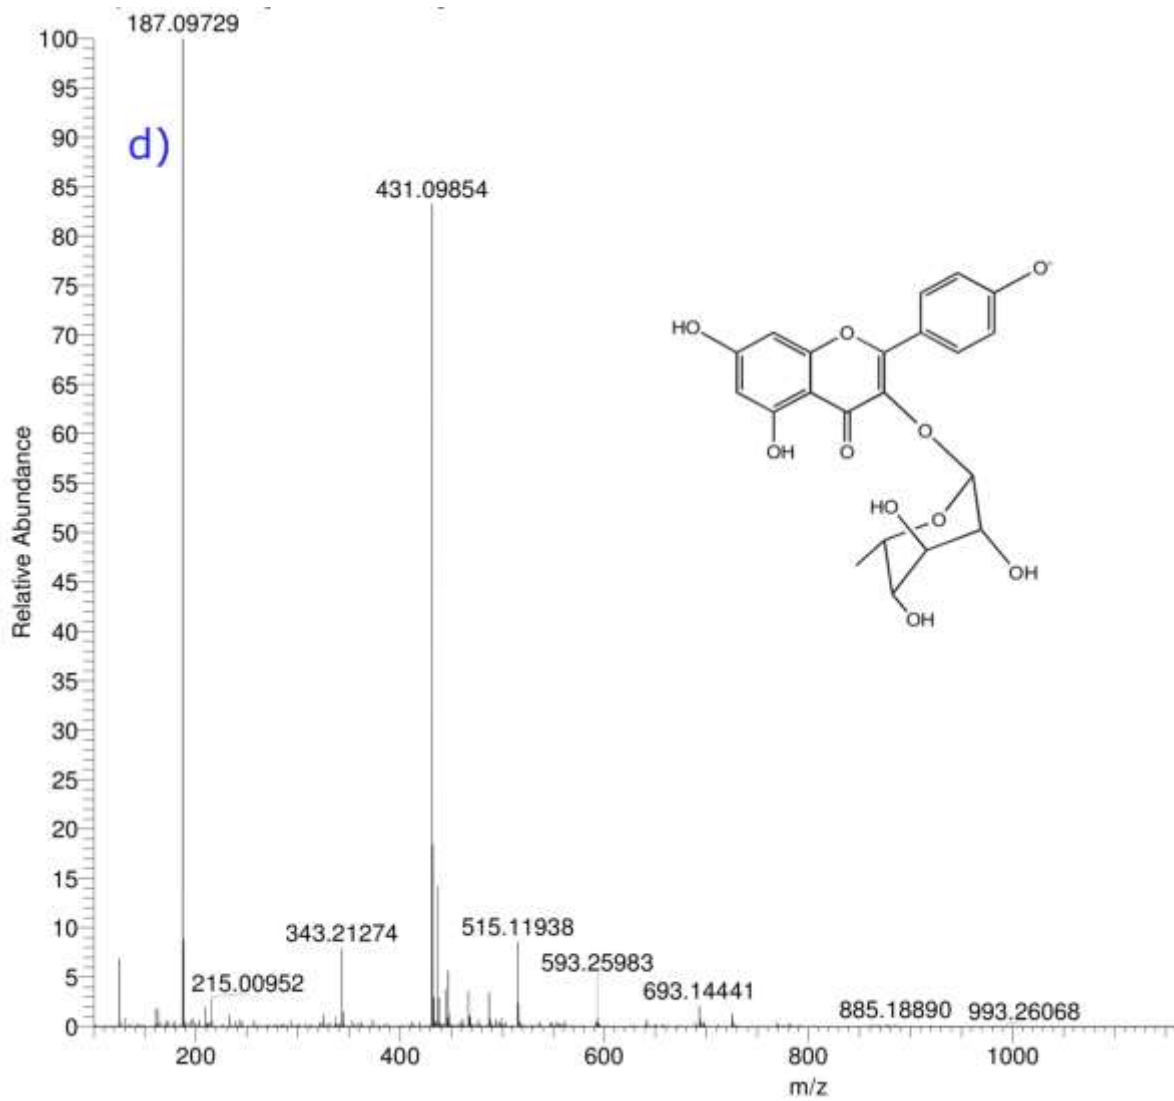

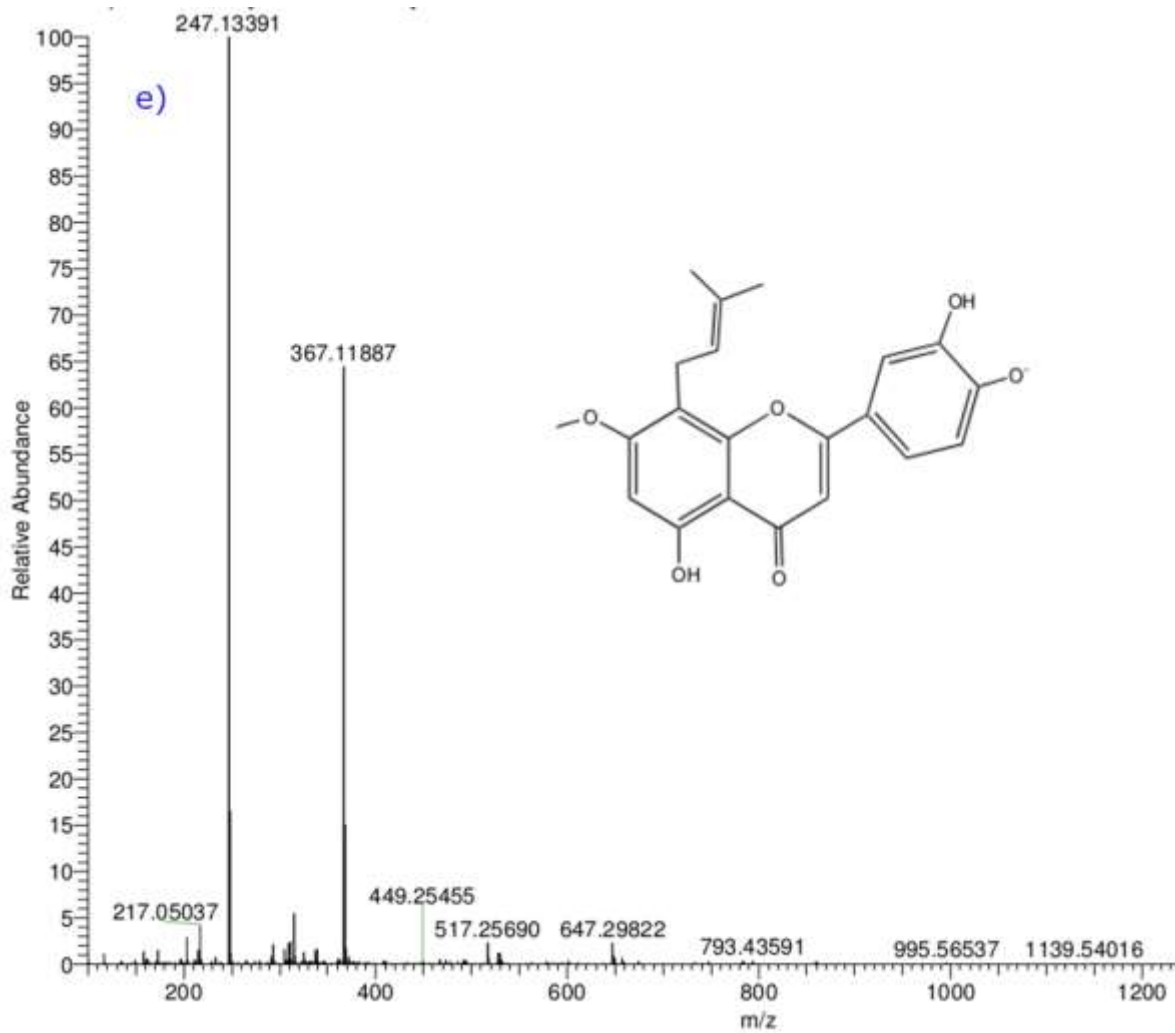

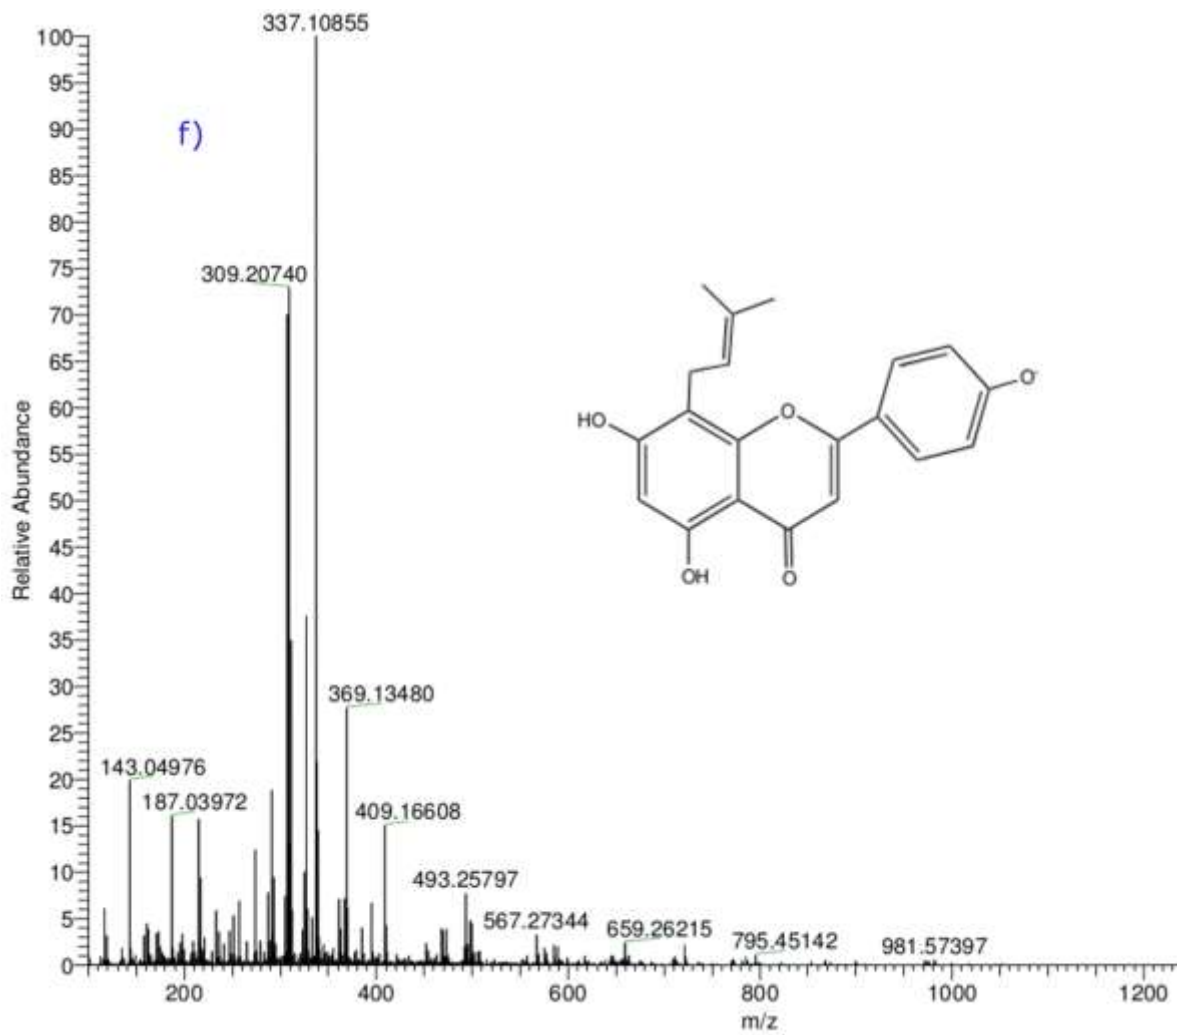

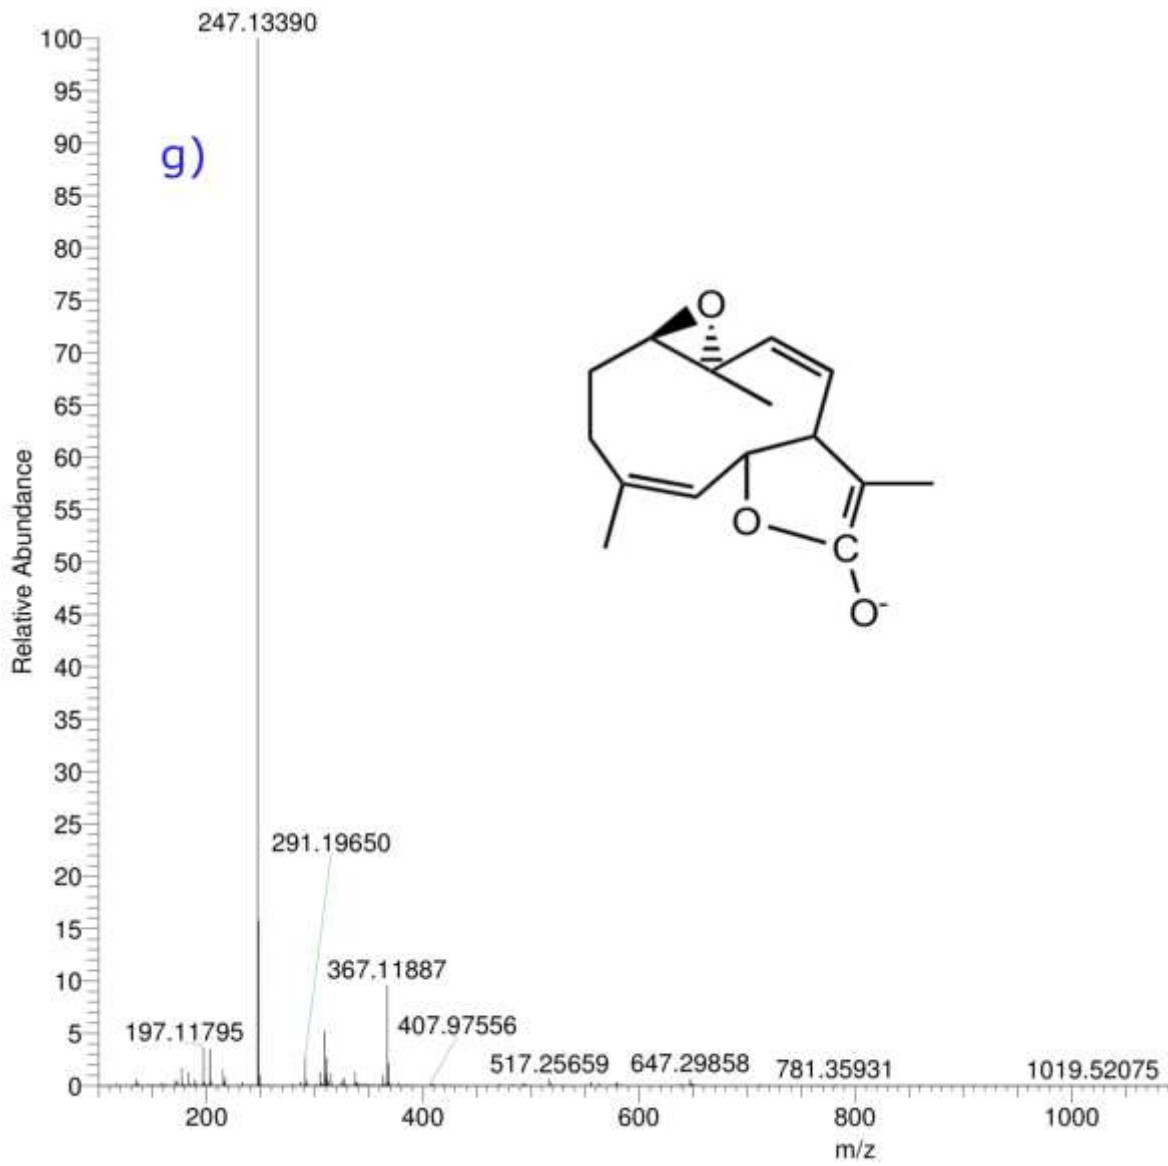



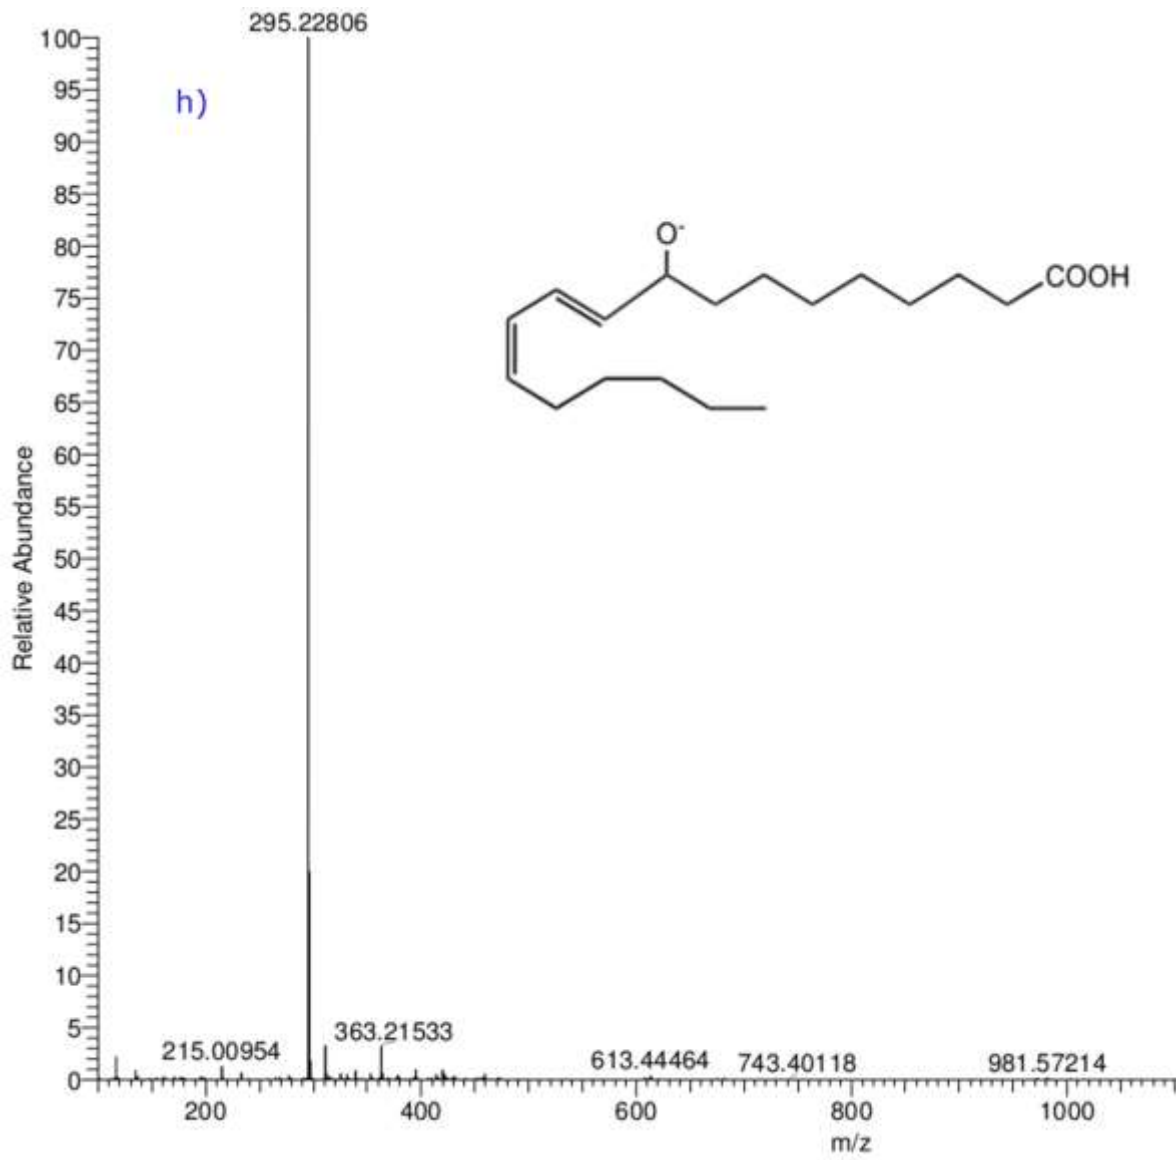

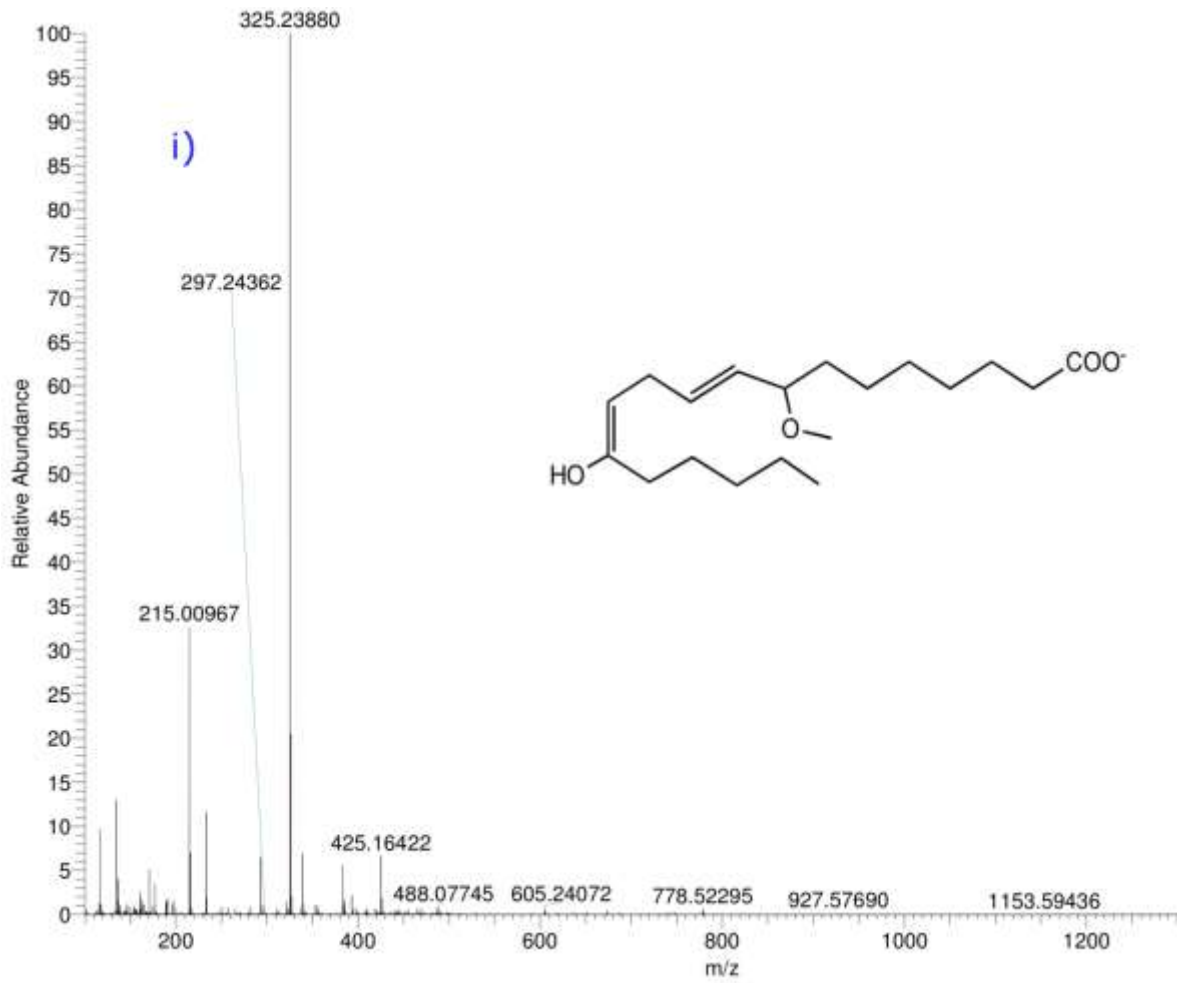

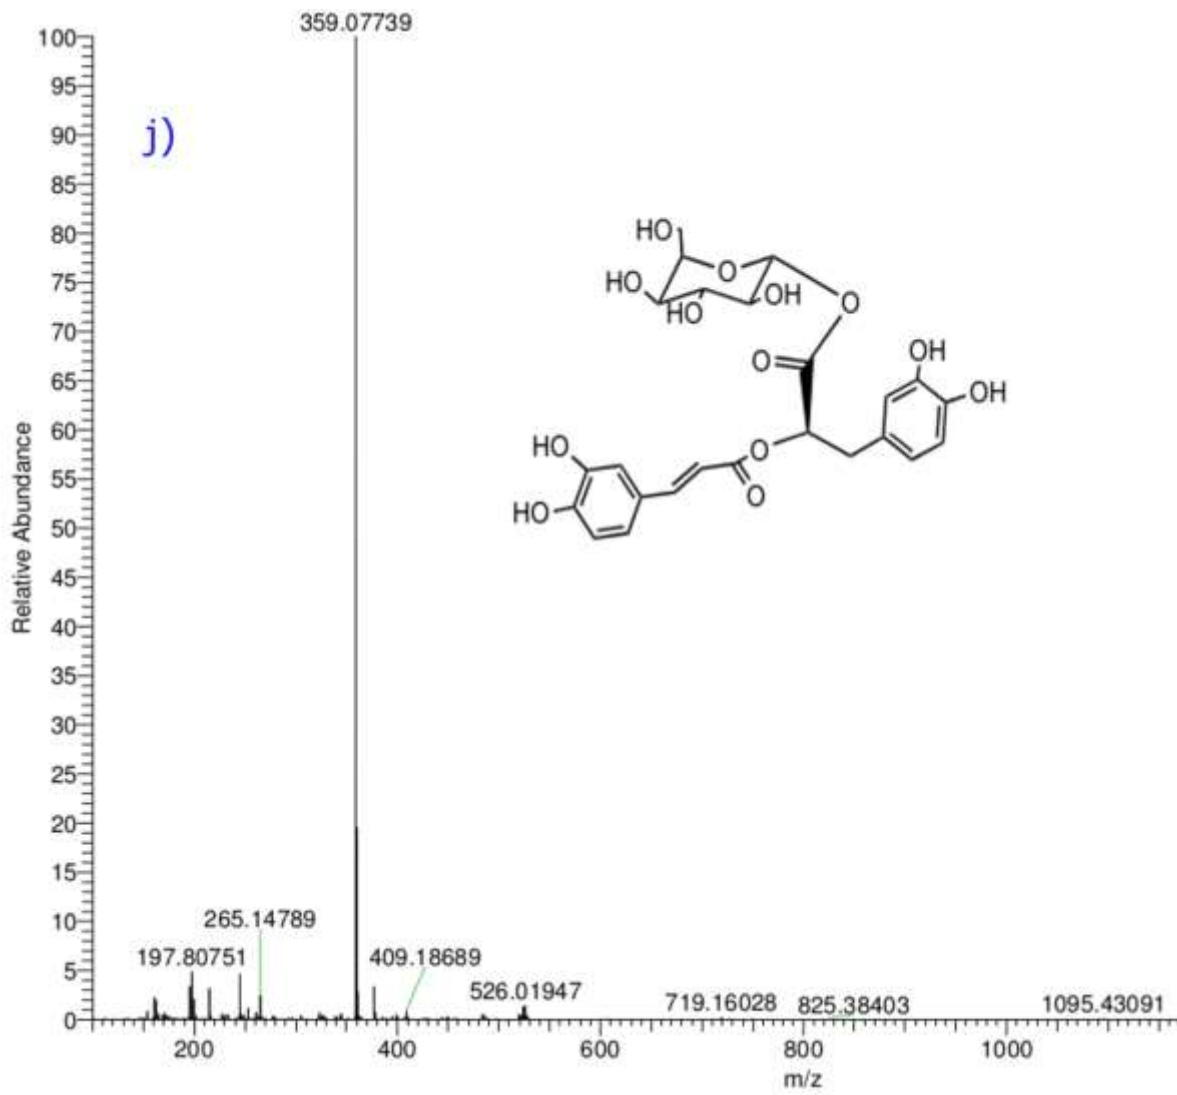

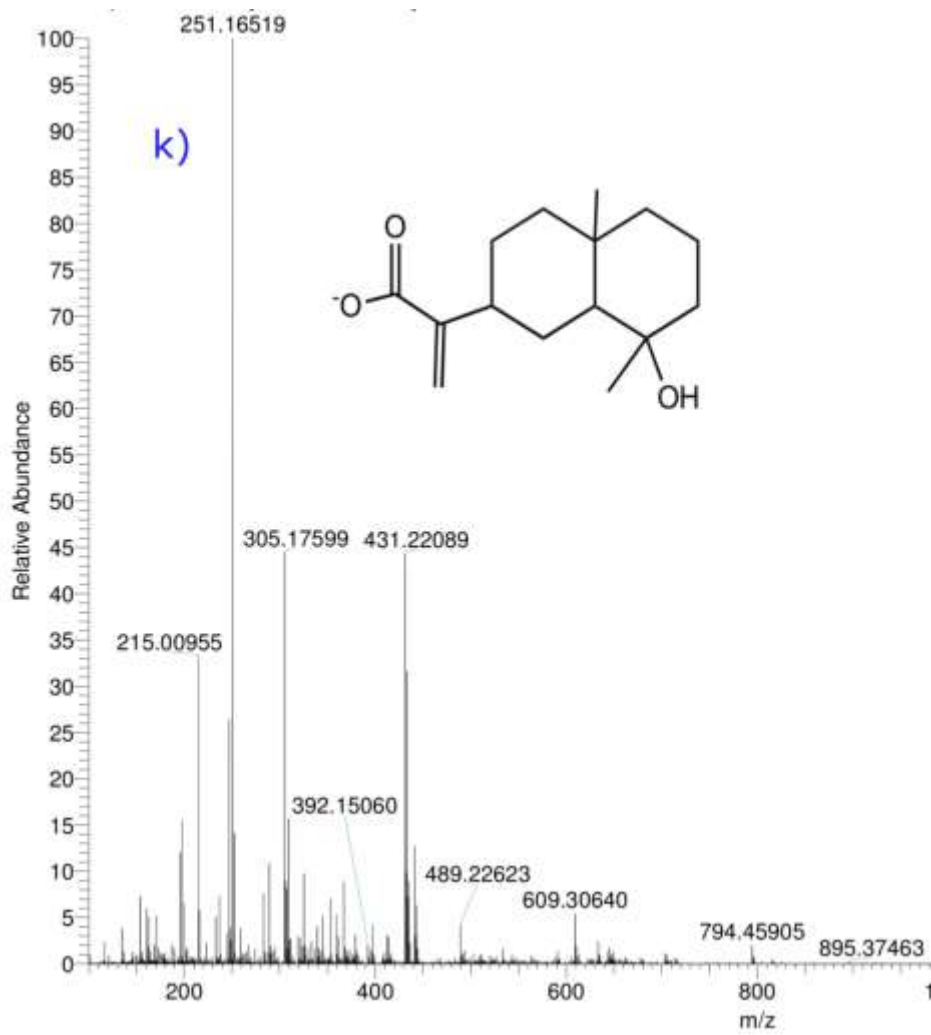

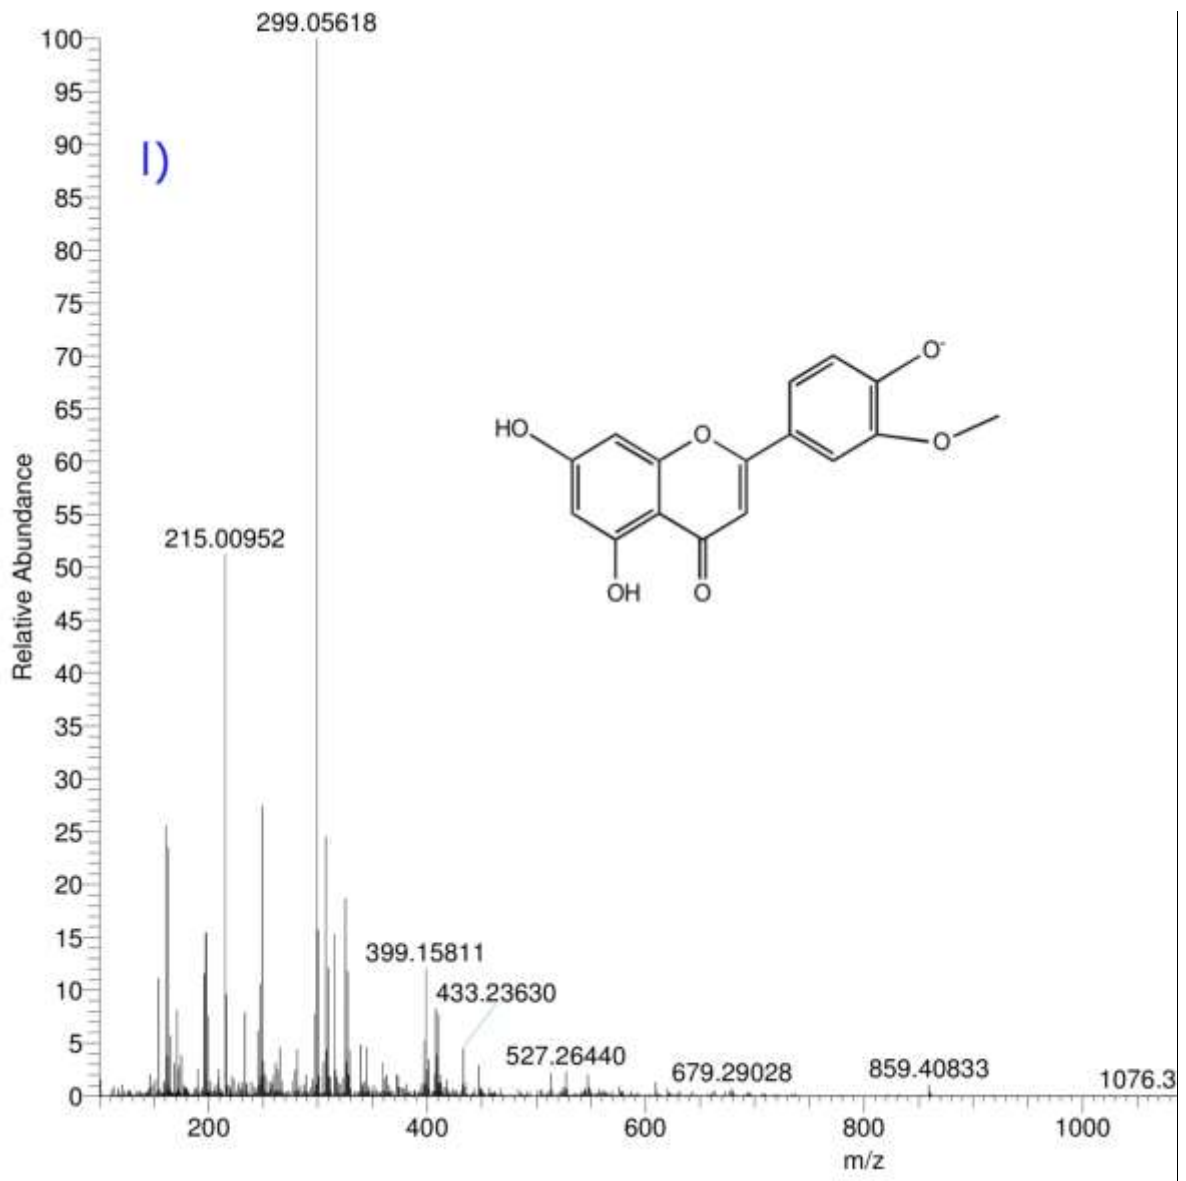

Supplement: IENZ_A_1466880_SM7650.pdf [file IENZ_A_1466880_SM7650.pdf]
